# Supplementary material for: Cytosine base editing systems with minimized off-target effect and molecular size
Source: Research Square preprint supplement (doi:10.21203/rs.3.rs-414230/v1), 2021-04-28
Supplement: Supplementary file 1 [file 3c78be2b01250158921661db.docx]

**Supplementary Sequence. S1_ Nucleotide sequences of coding region for yeast expression plasmids**

**Target-AID2S**

- Truncated PmCDA1 with point mutation (30-150, W122E, W139Q)

ATGTCGCATAGATGCTACGTTCTCTTTGAATTAAAACGACGGGGTGAACGTAGAGCGTGTTTTTGGGGCTATGCTGTGAATAAACCACAGAGCGGGACAGAACGTGGCATTCACGCCGAAATCTTTAGCATTAGAAAAGTCGAAGAATACCTGCGCGACAACCCCGGACAATTCACGATAAATTGGTACTCATCCTGGAGTCCTTGTGCAGATTGCGCTGAAAAGATCTTAGAATGGTATAACCAGGAGCTGCGGGGGAACGGCCACACTTTGAAAATCGAAGCTTGCAAACTCTATTACGAGAAAAATGCGAGGAATCAAATTGGGCTGCAAAACCTCAGAGATAACGGGGTTGGGTTGAATGTA

- GS Linker

GGCGGAGGTGGCAGTGGCGGGGGTGGCTCGGGTGGGGGAGGCAGTGGCGGAGGTGGCAGTGGCGGGGGTGGCTCGGGTGGGGGAGGATCC

- nSpCas9 (D10A) plus SV40 NLS

ATGGACAAGAAGTACTCCATTGGGCTCGCTATCGGCACAAACAGCGTCGGTTGGGCCGTCATTACGGACGAGTACAAGGTGCCGAGCAAAAAATTCAAAGTTCTGGGCAATACCGATCGCCACAGCATAAAGAAGAACCTCATTGGCGCCCTCCTGTTCGACTCCGGGGAGACGGCCGAAGCCACGCGGCTCAAAAGAACAGCACGGCGCAGATATACCCGCAGAAAGAATCGGATCTGCTACCTGCAGGAGATCTTTAGTAATGAGATGGCTAAGGTGGATGACTCTTTCTTCCATAGGCTGGAGGAGTCCTTTTTGGTGGAGGAGGATAAAAAGCACGAGCGCCACCCAATCTTTGGCAATATCGTGGACGAGGTGGCGTACCATGAAAAGTACCCAACCATATATCATCTGAGGAAGAAGCTTGTAGACAGTACTGATAAGGCTGACTTGCGGTTGATCTATCTCGCGCTGGCGCATATGATCAAATTTCGGGGACACTTCCTCATCGAGGGGGACCTGAACCCAGACAACAGCGATGTCGACAAACTCTTTATCCAACTGGTTCAGACTTACAATCAGCTTTTCGAAGAGAACCCGATCAACGCATCCGGAGTTGACGCCAAAGCAATCCTGAGCGCTAGGCTGTCCAAATCCCGGCGGCTCGAAAACCTCATCGCACAGCTCCCTGGGGAGAAGAAGAACGGCCTGTTTGGTAATCTTATCGCCCTGTCACTCGGGCTGACCCCCAACTTTAAATCTAACTTCGACCTGGCCGAAGATGCCAAGCTTCAACTGAGCAAAGACACCTACGATGATGATCTCGACAATCTGCTGGCCCAGATCGGCGACCAGTACGCAGACCTTTTTTTGGCGGCAAAGAACCTGTCAGACGCCATTCTGCTGAGTGATATTCTGCGAGTGAACACGGAGATCACCAAAGCTCCGCTGAGCGCTAGTATGATCAAGCGCTATGATGAGCACCACCAAGACTTGACTTTGCTGAAGGCCCTTGTCAGACAGCAACTGCCTGAGAAGTACAAGGAAATTTTCTTCGATCAGTCTAAAAATGGCTACGCCGGATACATTGACGGCGGAGCAAGCCAGGAGGAATTTTACAAATTTATTAAGCCCATCTTGGAAAAAATGGACGGCACCGAGGAGCTGCTGGTAAAGCTTAACAGAGAAGATCTGTTGCGCAAACAGCGCACTTTCGACAATGGAAGCATCCCCCACCAGATTCACCTGGGCGAACTGCACGCTATCCTCAGGCGGCAAGAGGATTTCTACCCCTTTTTGAAAGATAACAGGGAAAAGATTGAGAAAATCCTCACATTTCGGATACCCTACTATGTAGGCCCCCTCGCCCGGGGAAATTCCAGATTCGCGTGGATGACTCGCAAATCAGAAGAGACCATCACTCCCTGGAACTTCGAGGAAGTCGTGGATAAGGGGGCCTCTGCCCAGTCCTTCATCGAAAGGATGACTAACTTTGATAAAAATCTGCCTAACGAAAAGGTGCTTCCTAAACACTCTCTGCTGTACGAGTACTTCACAGTTTATAACGAGCTCACCAAGGTCAAATACGTCACAGAAGGGATGAGAAAGCCAGCATTCCTGTCTGGAGAGCAGAAGAAAGCTATCGTGGACCTCCTCTTCAAGACGAACCGGAAAGTTACCGTGAAACAGCTCAAAGAAGACTATTTCAAAAAGATTGAATGTTTCGACTCTGTTGAAATCAGCGGAGTGGAGGATCGCTTCAACGCATCCCTGGGAACGTATCACGATCTCCTGAAAATCATTAAAGACAAGGACTTCCTGGACAATGAGGAGAACGAGGACATTCTTGAGGACATTGTCCTCACCCTTACGTTGTTTGAAGATAGGGAGATGATTGAAGAACGCTTGAAAACTTACGCTCATCTCTTCGACGACAAAGTCATGAAACAGCTCAAGAGGCGCCGATATACAGGATGGGGGCGGCTGTCAAGAAAACTGATCAATGGGATCCGAGACAAGCAGAGTGGAAAGACAATCCTGGATTTTCTTAAGTCCGATGGATTTGCCAACCGGAACTTCATGCAGTTGATCCATGATGACTCTCTCACCTTTAAGGAGGACATCCAGAAAGCACAAGTTTCTGGCCAGGGGGACAGTCTTCACGAGCACATCGCTAATCTTGCAGGTAGCCCAGCTATCAAAAAGGGAATACTGCAGACCGTTAAGGTCGTGGATGAACTCGTCAAAGTAATGGGAAGGCATAAGCCCGAGAATATCGTTATCGAGATGGCCCGAGAGAACCAAACTACCCAGAAGGGACAGAAGAACAGTAGGGAAAGGATGAAGAGGATTGAAGAGGGTATAAAAGAACTGGGGTCCCAAATCCTTAAGGAACACCCAGTTGAAAACACCCAGCTTCAGAATGAGAAGCTCTACCTGTACTACCTGCAGAACGGCAGGGACATGTACGTGGATCAGGAACTGGACATCAATCGGCTCTCCGACTACGACGTGGATCATATCGTGCCCCAGTCTTTTCTCAAAGATGATTCTATTGATAATAAAGTGTTGACAAGATCCGATAAAAATAGAGGGAAGAGTGATAACGTCCCCTCAGAAGAAGTTGTCAAGAAAATGAAAAATTATTGGCGGCAGCTGCTGAACGCCAAACTGATCACACAACGGAAGTTCGATAATCTGACTAAGGCTGAACGAGGTGGCCTGTCTGAGTTGGATAAAGCCGGCTTCATCAAAAGGCAGCTTGTTGAGACACGCCAGATCACCAAGCACGTGGCCCAAATTCTCGATTCACGCATGAACACCAAGTACGATGAAAATGACAAACTGATTCGAGAGGTGAAAGTTATTACTCTGAAGTCTAAGCTGGTCTCAGATTTCAGAAAGGACTTTCAGTTTTATAAGGTGAGAGAGATCAACAATTACCACCATGCGCATGATGCCTACCTGAATGCAGTGGTAGGCACTGCACTTATCAAAAAATATCCCAAGCTTGAATCTGAATTTGTTTACGGAGACTATAAAGTGTACGATGTTAGGAAAATGATCGCAAAGTCTGAGCAGGAAATAGGCAAGGCCACCGCTAAGTACTTCTTTTACAGCAATATTATGAATTTTTTCAAGACCGAGATTACACTGGCCAATGGAGAGATTCGGAAGCGACCACTTATCGAAACAAACGGAGAAACAGGAGAAATCGTGTGGGACAAGGGTAGGGATTTCGCGACAGTCCGGAAGGTCCTGTCCATGCCGCAGGTGAACATCGTTAAAAAGACCGAAGTACAGACCGGAGGCTTCTCCAAGGAAAGTATCCTCCCGAAAAGGAACAGCGACAAGCTGATCGCACGCAAAAAAGATTGGGACCCCAAGAAATACGGCGGATTCGATTCTCCTACAGTCGCTTACAGTGTACTGGTTGTGGCCAAAGTGGAGAAAGGGAAGTCTAAAAAACTCAAAAGCGTCAAGGAACTGCTGGGCATCACAATCATGGAGCGATCAAGCTTCGAAAAAAACCCCATCGACTTTCTCGAGGCGAAAGGATATAAAGAGGTCAAAAAAGACCTCATCATTAAGCTTCCCAAGTACTCTCTCTTTGAGCTTGAAAACGGCCGGAAACGAATGCTCGCTAGTGCGGGCGAGCTGCAGAAAGGTAACGAGCTGGCACTGCCCTCTAAATACGTTAATTTCTTGTATCTGGCCAGCCACTATGAAAAGCTCAAAGGGTCTCCCGAAGATAATGAGCAGAAGCAGCTGTTCGTGGAACAACACAAACACTACCTTGATGAGATCATCGAGCAAATAAGCGAATTCTCCAAAAGAGTGATCCTCGCCGACGCTAACCTCGATAAGGTGCTTTCTGCTTACAATAAGCACAGGGATAAGCCCATCAGGGAGCAGGCAGAAAACATTATCCACTTGTTTACTCTGACCAACTTGGGCGCGCCTGCAGCCTTCAAGTACTTCGACACCACCATAGACAGAAAGCGGTACACCTCTACAAAGGAGGTCCTGGACGCCACACTGATTCATCAGTCAATTACGGGGCTCTATGAAACAAGAATCGACCTCTCTCAGCTCGGTGGAGACAGCAGGGCTGACCCCAAGAAGAAGAGGAAGGTGGGTACC

- UGI

ATGACCAACCTTTCCGACATCATAGAGAAGGAAACAGGCAAACAGTTGGTCATCCAAGAGTCGATACTCATGCTTCCTGAAGAAGTTGAGGAGGTCATTGGGAATAAGCCGGAAAGTGACATTCTCGTACACACTGCGTATGATGAGAGCACCGATGAGAACGTGATGCTGCTCACGTCAGATGCCCCAGAGTACAAACCCTGGGCTCTGGTGATTCAGGACTCTAATGGAGAGAACAAGATCAAGATGCTA

**Target-AID3S**

- nSpCas9 (D10A, 1-1054)

ATGGACAAGAAGTACTCCATTGGGCTCGCTATCGGCACAAACAGCGTCGGTTGGGCCGTCATTACGGACGAGTACAAGGTGCCGAGCAAAAAATTCAAAGTTCTGGGCAATACCGATCGCCACAGCATAAAGAAGAACCTCATTGGCGCCCTCCTGTTCGACTCCGGGGAGACGGCCGAAGCCACGCGGCTCAAAAGAACAGCACGGCGCAGATATACCCGCAGAAAGAATCGGATCTGCTACCTGCAGGAGATCTTTAGTAATGAGATGGCTAAGGTGGATGACTCTTTCTTCCATAGGCTGGAGGAGTCCTTTTTGGTGGAGGAGGATAAAAAGCACGAGCGCCACCCAATCTTTGGCAATATCGTGGACGAGGTGGCGTACCATGAAAAGTACCCAACCATATATCATCTGAGGAAGAAGCTTGTAGACAGTACTGATAAGGCTGACTTGCGGTTGATCTATCTCGCGCTGGCGCATATGATCAAATTTCGGGGACACTTCCTCATCGAGGGGGACCTGAACCCAGACAACAGCGATGTCGACAAACTCTTTATCCAACTGGTTCAGACTTACAATCAGCTTTTCGAAGAGAACCCGATCAACGCATCCGGAGTTGACGCCAAAGCAATCCTGAGCGCTAGGCTGTCCAAATCCCGGCGGCTCGAAAACCTCATCGCACAGCTCCCTGGGGAGAAGAAGAACGGCCTGTTTGGTAATCTTATCGCCCTGTCACTCGGGCTGACCCCCAACTTTAAATCTAACTTCGACCTGGCCGAAGATGCCAAGCTTCAACTGAGCAAAGACACCTACGATGATGATCTCGACAATCTGCTGGCCCAGATCGGCGACCAGTACGCAGACCTTTTTTTGGCGGCAAAGAACCTGTCAGACGCCATTCTGCTGAGTGATATTCTGCGAGTGAACACGGAGATCACCAAAGCTCCGCTGAGCGCTAGTATGATCAAGCGCTATGATGAGCACCACCAAGACTTGACTTTGCTGAAGGCCCTTGTCAGACAGCAACTGCCTGAGAAGTACAAGGAAATTTTCTTCGATCAGTCTAAAAATGGCTACGCCGGATACATTGACGGCGGAGCAAGCCAGGAGGAATTTTACAAATTTATTAAGCCCATCTTGGAAAAAATGGACGGCACCGAGGAGCTGCTGGTAAAGCTTAACAGAGAAGATCTGTTGCGCAAACAGCGCACTTTCGACAATGGAAGCATCCCCCACCAGATTCACCTGGGCGAACTGCACGCTATCCTCAGGCGGCAAGAGGATTTCTACCCCTTTTTGAAAGATAACAGGGAAAAGATTGAGAAAATCCTCACATTTCGGATACCCTACTATGTAGGCCCCCTCGCCCGGGGAAATTCCAGATTCGCGTGGATGACTCGCAAATCAGAAGAGACCATCACTCCCTGGAACTTCGAGGAAGTCGTGGATAAGGGGGCCTCTGCCCAGTCCTTCATCGAAAGGATGACTAACTTTGATAAAAATCTGCCTAACGAAAAGGTGCTTCCTAAACACTCTCTGCTGTACGAGTACTTCACAGTTTATAACGAGCTCACCAAGGTCAAATACGTCACAGAAGGGATGAGAAAGCCAGCATTCCTGTCTGGAGAGCAGAAGAAAGCTATCGTGGACCTCCTCTTCAAGACGAACCGGAAAGTTACCGTGAAACAGCTCAAAGAAGACTATTTCAAAAAGATTGAATGTTTCGACTCTGTTGAAATCAGCGGAGTGGAGGATCGCTTCAACGCATCCCTGGGAACGTATCACGATCTCCTGAAAATCATTAAAGACAAGGACTTCCTGGACAATGAGGAGAACGAGGACATTCTTGAGGACATTGTCCTCACCCTTACGTTGTTTGAAGATAGGGAGATGATTGAAGAACGCTTGAAAACTTACGCTCATCTCTTCGACGACAAAGTCATGAAACAGCTCAAGAGGCGCCGATATACAGGATGGGGGCGGCTGTCAAGAAAACTGATCAATGGGATCCGAGACAAGCAGAGTGGAAAGACAATCCTGGATTTTCTTAAGTCCGATGGATTTGCCAACCGGAACTTCATGCAGTTGATCCATGATGACTCTCTCACCTTTAAGGAGGACATCCAGAAAGCACAAGTTTCTGGCCAGGGGGACAGTCTTCACGAGCACATCGCTAATCTTGCAGGTAGCCCAGCTATCAAAAAGGGAATACTGCAGACCGTTAAGGTCGTGGATGAACTCGTCAAAGTAATGGGAAGGCATAAGCCCGAGAATATCGTTATCGAGATGGCCCGAGAGAACCAAACTACCCAGAAGGGACAGAAGAACAGTAGGGAAAGGATGAAGAGGATTGAAGAGGGTATAAAAGAACTGGGGTCCCAAATCCTTAAGGAACACCCAGTTGAAAACACCCAGCTTCAGAATGAGAAGCTCTACCTGTACTACCTGCAGAACGGCAGGGACATGTACGTGGATCAGGAACTGGACATCAATCGGCTCTCCGACTACGACGTGGATCATATCGTGCCCCAGTCTTTTCTCAAAGATGATTCTATTGATAATAAAGTGTTGACAAGATCCGATAAAAATAGAGGGAAGAGTGATAACGTCCCCTCAGAAGAAGTTGTCAAGAAAATGAAAAATTATTGGCGGCAGCTGCTGAACGCCAAACTGATCACACAACGGAAGTTCGATAATCTGACTAAGGCTGAACGAGGTGGCCTGTCTGAGTTGGATAAAGCCGGCTTCATCAAAAGGCAGCTTGTTGAGACACGCCAGATCACCAAGCACGTGGCCCAAATTCTCGATTCACGCATGAACACCAAGTACGATGAAAATGACAAACTGATTCGAGAGGTGAAAGTTATTACTCTGAAGTCTAAGCTGGTCTCAGATTTCAGAAAGGACTTTCAGTTTTATAAGGTGAGAGAGATCAACAATTACCACCATGCGCATGATGCCTACCTGAATGCAGTGGTAGGCACTGCACTTATCAAAAAATATCCCAAGCTTGAATCTGAATTTGTTTACGGAGACTATAAAGTGTACGATGTTAGGAAAATGATCGCAAAGTCTGAGCAGGAAATAGGCAAGGCCACCGCTAAGTACTTCTTTTACAGCAATATTATGAATTTTTTCAAGACCGAGATTACACTGGCCAAT

- Truncated PmCDA1 with point mutation (30-150, W122E, W139Q)

TCGCATAGATGCTACGTTCTCTTTGAATTAAAACGACGGGGTGAACGTAGAGCGTGTTTTTGGGGCTATGCTGTGAATAAACCACAGAGCGGGACAGAACGTGGCATTCACGCCGAAATCTTTAGCATTAGAAAAGTCGAAGAATACCTGCGCGACAACCCCGGACAATTCACGATAAATTGGTACTCATCCTGGAGTCCTTGTGCAGATTGCGCTGAAAAGATCTTAGAATGGTATAACCAGGAGCTGCGGGGGAACGGCCACACTTTGAAAATCGAAGCTTGCAAACTCTATTACGAGAAAAATGCGAGGAATCAAATTGGGCTGCAAAACCTCAGAGATAACGGGGTTGGGTTGAATGTA

- GS Linker

GGCGGAGGCGGTAGCGACGTCGGTGGAGGTTCA

- nSpCas9 (D10A, 1055-1368)

GGAGAGATTCGGAAGCGACCACTTATCGAAACAAACGGAGAAACAGGAGAAATCGTGTGGGACAAGGGTAGGGATTTCGCGACAGTCCGGAAGGTCCTGTCCATGCCGCAGGTGAACATCGTTAAAAAGACCGAAGTACAGACCGGAGGCTTCTCCAAGGAAAGTATCCTCCCGAAAAGGAACAGCGACAAGCTGATCGCACGCAAAAAAGATTGGGACCCCAAGAAATACGGCGGATTCGATTCTCCTACAGTCGCTTACAGTGTACTGGTTGTGGCCAAAGTGGAGAAAGGGAAGTCTAAAAAACTCAAAAGCGTCAAGGAACTGCTGGGCATCACAATCATGGAGCGATCAAGCTTCGAAAAAAACCCCATCGACTTTCTCGAGGCGAAAGGATATAAAGAGGTCAAAAAAGACCTCATCATTAAGCTTCCCAAGTACTCTCTCTTTGAGCTTGAAAACGGCCGGAAACGAATGCTCGCTAGTGCGGGCGAGCTGCAGAAAGGTAACGAGCTGGCACTGCCCTCTAAATACGTTAATTTCTTGTATCTGGCCAGCCACTATGAAAAGCTCAAAGGGTCTCCCGAAGATAATGAGCAGAAGCAGCTGTTCGTGGAACAACACAAACACTACCTTGATGAGATCATCGAGCAAATAAGCGAATTCTCCAAAAGAGTGATCCTCGCCGACGCTAACCTCGATAAGGTGCTTTCTGCTTACAATAAGCACAGGGATAAGCCCATCAGGGAGCAGGCAGAAAACATTATCCACTTGTTTACTCTGACCAACTTGGGCGCGCCTGCAGCCTTCAAGTACTTCGACACCACCATAGACAGAAAGCGGTACACCTCTACAAAGGAGGTCCTGGACGCCACACTGATTCATCAGTCAATTACGGGGCTCTATGAAACAAGAATCGACCTCTCTCAGCTCGGTGGAGACAGCAGGGCTGACCCCAAGAAGAAGAGGAAGGTGGGTACC

- UGI

ATGACCAACCTTTCCGACATCATAGAGAAGGAAACAGGCAAACAGTTGGTCATCCAAGAGTCGATACTCATGCTTCCTGAAGAAGTTGAGGAGGTCATTGGGAATAAGCCGGAAAGTGACATTCTCGTACACACTGCGTATGATGAGAGCACCGATGAGAACGTGATGCTGCTCACGTCAGATGCCCCAGAGTACAAACCCTGGGCTCTGGTGATTCAGGACTCTAATGGAGAGAACAAGATCAAGATGCTA

**Supplementary Sequence. S2_ Nucleotide sequences of coding region of SpCas9 related variants for mammalian expression**

**Target-AID2S**

- NLS unit

ATGAAACGGACAGCCGACGGAAGCGAGTTCGAGTCACCAAAGAAGAAGCGGAAAGTC

- Truncated PmCDA1 with point mutation (30-150, W122E, W139Q)

TCACACCGCTGCTACGTGCTGTTTGAGTTGAAGCGAAGGGGCGAAAGAAGGGCTTGCTTTTGGGGCTATGCCGTCAACAAGCCCCAAAGTGGCACCGAGAGAGGAATACACGCTGAGATATTCAGTATCCGAAAGGTGGAAGAGTATCTTCGGGATAATCCTGGGCAGTTTACGATCAACTGGTATTCCAGCTGGAGTCCTTGCGCTGATTGTGCCGAGAAAATTCTGGAATGGTATAATCAGGAACTTCGGGGAAACGGGCACACATTGAAAATCGAAGCCTGCAAGCTGTACTACGAGAAGAATGCCCGGAACCAGATAGGACTCCAGAATCTGAGGGACAATGGTGTAGGCCTGAACGTG

- GS Linker

GGTGGAGGTGGCAGTGATGTCGGCGGAGGCTCC

- nSpCas9 (D10A) plus linker

GACAAGAAGTACAGCATCGGCCTGGCCATCGGCACCAACTCTGTGGGCTGGGCCGTGATCACCGACGAGTACAAGGTGCCCAGCAAGAAATTCAAGGTGCTGGGCAACACCGACCGGCACAGCATCAAGAAGAACCTGATCGGAGCCCTGCTGTTCGACAGCGGCGAAACAGCCGAGGCCACCCGGCTGAAGAGAACCGCCAGAAGAAGATACACCAGACGGAAGAACCGGATCTGCTATCTGCAAGAGATCTTCAGCAACGAGATGGCCAAGGTGGACGACAGCTTCTTCCACAGACTGGAAGAGTCCTTCCTGGTGGAAGAGGATAAGAAGCACGAGCGGCACCCCATCTTCGGCAACATCGTGGACGAGGTGGCCTACCACGAGAAGTACCCCACCATCTACCACCTGAGAAAGAAACTGGTGGACAGCACCGACAAGGCCGACCTGCGGCTGATCTATCTGGCCCTGGCCCACATGATCAAGTTCCGGGGCCACTTCCTGATCGAGGGCGACCTGAACCCCGACAACAGCGACGTGGACAAGCTGTTCATCCAGCTGGTGCAGACCTACAACCAGCTGTTCGAGGAAAACCCCATCAACGCCAGCGGCGTGGACGCCAAGGCCATCCTGTCTGCCAGACTGAGCAAGAGCAGACGGCTGGAAAATCTGATCGCCCAGCTGCCCGGCGAGAAGAAGAATGGCCTGTTCGGAAACCTGATTGCCCTGAGCCTGGGCCTGACCCCCAACTTCAAGAGCAACTTCGACCTGGCCGAGGATGCCAAACTGCAGCTGAGCAAGGACACCTACGACGACGACCTGGACAACCTGCTGGCCCAGATCGGCGACCAGTACGCCGACCTGTTTCTGGCCGCCAAGAACCTGTCCGACGCCATCCTGCTGAGCGACATCCTGAGAGTGAACACCGAAATCACCAAGGCCCCCCTGAGCGCCTCTATGATCAAGAGATACGACGAGCACCACCAGGACCTGACCCTGCTGAAAGCTCTCGTGCGGCAGCAGCTGCCTGAGAAGTACAAAGAGATTTTCTTCGACCAGAGCAAGAACGGCTACGCCGGCTACATTGACGGCGGAGCCAGCCAGGAAGAGTTCTACAAGTTCATCAAGCCCATCCTGGAAAAGATGGACGGCACCGAGGAACTGCTCGTGAAGCTGAACAGAGAGGACCTGCTGCGGAAGCAGCGGACCTTCGACAACGGCAGCATCCCCCACCAGATCCACCTGGGAGAGCTGCACGCCATTCTGCGGCGGCAGGAAGATTTTTACCCATTCCTGAAGGACAACCGGGAAAAGATCGAGAAGATCCTGACCTTCCGCATTCCCTACTACGTGGGCCCTCTGGCCAGGGGAAACAGCAGATTCGCCTGGATGACCAGAAAGAGCGAGGAAACCATCACCCCCTGGAACTTCGAGGAAGTGGTGGACAAGGGCGCTTCCGCCCAGAGCTTCATCGAGCGGATGACCAACTTCGATAAGAACCTGCCCAACGAGAAGGTGCTGCCCAAGCACAGCCTGCTGTACGAGTACTTCACCGTGTATAACGAGCTGACCAAAGTGAAATACGTGACCGAGGGAATGAGAAAGCCCGCCTTCCTGAGCGGCGAGCAGAAAAAGGCCATCGTGGACCTGCTGTTCAAGACCAACCGGAAAGTGACCGTGAAGCAGCTGAAAGAGGACTACTTCAAGAAAATCGAGTGCTTCGACTCCGTGGAAATCTCCGGCGTGGAAGATCGGTTCAACGCCTCCCTGGGCACATACCACGATCTGCTGAAAATTATCAAGGACAAGGACTTCCTGGACAATGAGGAAAACGAGGACATTCTGGAAGATATCGTGCTGACCCTGACACTGTTTGAGGACAGAGAGATGATCGAGGAACGGCTGAAAACCTATGCCCACCTGTTCGACGACAAAGTGATGAAGCAGCTGAAGCGGCGGAGATACACCGGCTGGGGCAGGCTGAGCCGGAAGCTGATCAACGGCATCCGGGACAAGCAGTCCGGCAAGACAATCCTGGATTTCCTGAAGTCCGACGGCTTCGCCAACAGAAACTTCATGCAGCTGATCCACGACGACAGCCTGACCTTTAAAGAGGACATCCAGAAAGCCCAGGTGTCCGGCCAGGGCGATAGCCTGCACGAGCACATTGCCAATCTGGCCGGCAGCCCCGCCATTAAGAAGGGCATCCTGCAGACAGTGAAGGTGGTGGACGAGCTCGTGAAAGTGATGGGCCGGCACAAGCCCGAGAACATCGTGATCGAAATGGCCAGAGAGAACCAGACCACCCAGAAGGGACAGAAGAACAGCCGCGAGAGAATGAAGCGGATCGAAGAGGGCATCAAAGAGCTGGGCAGCCAGATCCTGAAAGAACACCCCGTGGAAAACACCCAGCTGCAGAACGAGAAGCTGTACCTGTACTACCTGCAGAATGGGCGGGATATGTACGTGGACCAGGAACTGGACATCAACCGGCTGTCCGACTACGATGTGGACCATATCGTGCCTCAGAGCTTTCTGAAGGACGACTCCATCGACAACAAGGTGCTGACCAGAAGCGACAAGAACCGGGGCAAGAGCGACAACGTGCCCTCCGAAGAGGTCGTGAAGAAGATGAAGAACTACTGGCGGCAGCTGCTGAACGCCAAGCTGATTACCCAGAGAAAGTTCGACAATCTGACCAAGGCCGAGAGAGGCGGCCTGAGCGAACTGGATAAGGCCGGCTTCATCAAGAGACAGCTGGTGGAAACCCGGCAGATCACAAAGCACGTGGCACAGATCCTGGACTCCCGGATGAACACTAAGTACGACGAGAATGACAAGCTGATCCGGGAAGTGAAAGTGATCACCCTGAAGTCCAAGCTGGTGTCCGATTTCCGGAAGGATTTCCAGTTTTACAAAGTGCGCGAGATCAACAACTACCACCACGCCCACGACGCCTACCTGAACGCCGTCGTGGGAACCGCCCTGATCAAAAAGTACCCTAAGCTGGAAAGCGAGTTCGTGTACGGCGACTACAAGGTGTACGACGTGCGGAAGATGATCGCCAAGAGCGAGCAGGAAATCGGCAAGGCTACCGCCAAGTACTTCTTCTACAGCAACATCATGAACTTTTTCAAGACCGAGATTACCCTGGCCAACGGCGAGATCCGGAAGCGGCCTCTGATCGAGACAAACGGCGAAACCGGGGAGATCGTGTGGGATAAGGGCCGGGATTTTGCCACCGTGCGGAAAGTGCTGAGCATGCCCCAAGTGAATATCGTGAAAAAGACCGAGGTGCAGACAGGCGGCTTCAGCAAAGAGTCTATCCTGCCCAAGAGGAACAGCGATAAGCTGATCGCCAGAAAGAAGGACTGGGACCCTAAGAAGTACGGCGGCTTCGACAGCCCCACCGTGGCCTATTCTGTGCTGGTGGTGGCCAAAGTGGAAAAGGGCAAGTCCAAGAAACTGAAGAGTGTGAAAGAGCTGCTGGGGATCACCATCATGGAAAGAAGCAGCTTCGAGAAGAATCCCATCGACTTTCTGGAAGCCAAGGGCTACAAAGAAGTGAAAAAGGACCTGATCATCAAGCTGCCTAAGTACTCCCTGTTCGAGCTGGAAAACGGCCGGAAGAGAATGCTGGCCTCTGCCGGCGAACTGCAGAAGGGAAACGAACTGGCCCTGCCCTCCAAATATGTGAACTTCCTGTACCTGGCCAGCCACTATGAGAAGCTGAAGGGCTCCCCCGAGGATAATGAGCAGAAACAGCTGTTTGTGGAACAGCACAAGCACTACCTGGACGAGATCATCGAGCAGATCAGCGAGTTCTCCAAGAGAGTGATCCTGGCCGACGCTAATCTGGACAAAGTGCTGTCCGCCTACAACAAGCACCGGGATAAGCCCATCAGAGAGCAGGCCGAGAATATCATCCACCTGTTTACCCTGACCAATCTGGGAGCCCCTGCCGCCTTCAAGTACTTTGACACCACCATCGACCGGAAGAGGTACACCAGCACCAAAGAGGTGCTGGACGCCACCCTGATCCACCAGAGCATCACCGGCCTGTACGAGACACGGATCGACCTGTCTCAGCTGGGAGGTGACAGCGGCGGGAGCGGCGGGAGCGGGGGGAGC

- 2xUGI plus SV40 NLS

ACTAATCTGAGCGACATCATTGAGAAGGAGACTGGGAAACAGCTGGTCATTCAGGAGTCCATCCTGATGCTGCCTGAGGAGGTGGAGGAAGTGATCGGCAACAAGCCAGAGTCTGACATCCTGGTGCACACCGCCTACGACGAGTCCACAGATGAGAATGTGATGCTGCTGACCTCTGACGCCCCCGAGTATAAGCCTTGGGCCCTGGTCATCCAGGATTCTAACGGCGAGAATAAGATCAAGATGCTGAGCGGAGGATCCGGAGGATCTGGAGGCAGCACCAACCTGTCTGACATCATCGAGAAGGAGACAGGCAAGCAGCTGGTCATCCAGGAGAGCATCCTGATGCTGCCCGAAGAAGTCGAAGAAGTGATCGGAAACAAGCCTGAGAGCGATATCCTGGTCCATACCGCCTACGACGAGAGTACCGACGAAAATGTGATGCTGCTGACATCCGACGCCCCAGAGTATAAGCCCTGGGCTCTGGTCATCCAGGATTCCAACGGAGAGAACAAAATCAAAATGCTGTCTGGCGGCTCAAAAAGAACCGCCGACGGCAGCGAATTCGAGCCCAAGAAGAAGAGGAAAGTC

**Target-AID3S**

- NLS unit

ATGAAACGGACAGCCGACGGAAGCGAGTTCGAGTCACCAAAGAAGAAGCGGAAAGTC

- nSpCas9 (D10A, 1-1054)

GACAAGAAGTACAGCATCGGCCTGGCCATCGGCACCAACTCTGTGGGCTGGGCCGTGATCACCGACGAGTACAAGGTGCCCAGCAAGAAATTCAAGGTGCTGGGCAACACCGACCGGCACAGCATCAAGAAGAACCTGATCGGAGCCCTGCTGTTCGACAGCGGCGAAACAGCCGAGGCCACCCGGCTGAAGAGAACCGCCAGAAGAAGATACACCAGACGGAAGAACCGGATCTGCTATCTGCAAGAGATCTTCAGCAACGAGATGGCCAAGGTGGACGACAGCTTCTTCCACAGACTGGAAGAGTCCTTCCTGGTGGAAGAGGATAAGAAGCACGAGCGGCACCCCATCTTCGGCAACATCGTGGACGAGGTGGCCTACCACGAGAAGTACCCCACCATCTACCACCTGAGAAAGAAACTGGTGGACAGCACCGACAAGGCCGACCTGCGGCTGATCTATCTGGCCCTGGCCCACATGATCAAGTTCCGGGGCCACTTCCTGATCGAGGGCGACCTGAACCCCGACAACAGCGACGTGGACAAGCTGTTCATCCAGCTGGTGCAGACCTACAACCAGCTGTTCGAGGAAAACCCCATCAACGCCAGCGGCGTGGACGCCAAGGCCATCCTGTCTGCCAGACTGAGCAAGAGCAGACGGCTGGAAAATCTGATCGCCCAGCTGCCCGGCGAGAAGAAGAATGGCCTGTTCGGAAACCTGATTGCCCTGAGCCTGGGCCTGACCCCCAACTTCAAGAGCAACTTCGACCTGGCCGAGGATGCCAAACTGCAGCTGAGCAAGGACACCTACGACGACGACCTGGACAACCTGCTGGCCCAGATCGGCGACCAGTACGCCGACCTGTTTCTGGCCGCCAAGAACCTGTCCGACGCCATCCTGCTGAGCGACATCCTGAGAGTGAACACCGAAATCACCAAGGCCCCCCTGAGCGCCTCTATGATCAAGAGATACGACGAGCACCACCAGGACCTGACCCTGCTGAAAGCTCTCGTGCGGCAGCAGCTGCCTGAGAAGTACAAAGAGATTTTCTTCGACCAGAGCAAGAACGGCTACGCCGGCTACATTGACGGCGGAGCCAGCCAGGAAGAGTTCTACAAGTTCATCAAGCCCATCCTGGAAAAGATGGACGGCACCGAGGAACTGCTCGTGAAGCTGAACAGAGAGGACCTGCTGCGGAAGCAGCGGACCTTCGACAACGGCAGCATCCCCCACCAGATCCACCTGGGAGAGCTGCACGCCATTCTGCGGCGGCAGGAAGATTTTTACCCATTCCTGAAGGACAACCGGGAAAAGATCGAGAAGATCCTGACCTTCCGCATTCCCTACTACGTGGGCCCTCTGGCCAGGGGAAACAGCAGATTCGCCTGGATGACCAGAAAGAGCGAGGAAACCATCACCCCCTGGAACTTCGAGGAAGTGGTGGACAAGGGCGCTTCCGCCCAGAGCTTCATCGAGCGGATGACCAACTTCGATAAGAACCTGCCCAACGAGAAGGTGCTGCCCAAGCACAGCCTGCTGTACGAGTACTTCACCGTGTATAACGAGCTGACCAAAGTGAAATACGTGACCGAGGGAATGAGAAAGCCCGCCTTCCTGAGCGGCGAGCAGAAAAAGGCCATCGTGGACCTGCTGTTCAAGACCAACCGGAAAGTGACCGTGAAGCAGCTGAAAGAGGACTACTTCAAGAAAATCGAGTGCTTCGACTCCGTGGAAATCTCCGGCGTGGAAGATCGGTTCAACGCCTCCCTGGGCACATACCACGATCTGCTGAAAATTATCAAGGACAAGGACTTCCTGGACAATGAGGAAAACGAGGACATTCTGGAAGATATCGTGCTGACCCTGACACTGTTTGAGGACAGAGAGATGATCGAGGAACGGCTGAAAACCTATGCCCACCTGTTCGACGACAAAGTGATGAAGCAGCTGAAGCGGCGGAGATACACCGGCTGGGGCAGGCTGAGCCGGAAGCTGATCAACGGCATCCGGGACAAGCAGTCCGGCAAGACAATCCTGGATTTCCTGAAGTCCGACGGCTTCGCCAACAGAAACTTCATGCAGCTGATCCACGACGACAGCCTGACCTTTAAAGAGGACATCCAGAAAGCCCAGGTGTCCGGCCAGGGCGATAGCCTGCACGAGCACATTGCCAATCTGGCCGGCAGCCCCGCCATTAAGAAGGGCATCCTGCAGACAGTGAAGGTGGTGGACGAGCTCGTGAAAGTGATGGGCCGGCACAAGCCCGAGAACATCGTGATCGAAATGGCCAGAGAGAACCAGACCACCCAGAAGGGACAGAAGAACAGCCGCGAGAGAATGAAGCGGATCGAAGAGGGCATCAAAGAGCTGGGCAGCCAGATCCTGAAAGAACACCCCGTGGAAAACACCCAGCTGCAGAACGAGAAGCTGTACCTGTACTACCTGCAGAATGGGCGGGATATGTACGTGGACCAGGAACTGGACATCAACCGGCTGTCCGACTACGATGTGGACCATATCGTGCCTCAGAGCTTTCTGAAGGACGACTCCATCGACAACAAGGTGCTGACCAGAAGCGACAAGAACCGGGGCAAGAGCGACAACGTGCCCTCCGAAGAGGTCGTGAAGAAGATGAAGAACTACTGGCGGCAGCTGCTGAACGCCAAGCTGATTACCCAGAGAAAGTTCGACAATCTGACCAAGGCCGAGAGAGGCGGCCTGAGCGAACTGGATAAGGCCGGCTTCATCAAGAGACAGCTGGTGGAAACCCGGCAGATCACAAAGCACGTGGCACAGATCCTGGACTCCCGGATGAACACTAAGTACGACGAGAATGACAAGCTGATCCGGGAAGTGAAAGTGATCACCCTGAAGTCCAAGCTGGTGTCCGATTTCCGGAAGGATTTCCAGTTTTACAAAGTGCGCGAGATCAACAACTACCACCACGCCCACGACGCCTACCTGAACGCCGTCGTGGGAACCGCCCTGATCAAAAAGTACCCTAAGCTGGAAAGCGAGTTCGTGTACGGCGACTACAAGGTGTACGACGTGCGGAAGATGATCGCCAAGAGCGAGCAGGAAATCGGCAAGGCTACCGCCAAGTACTTCTTCTACAGCAACATCATGAACTTTTTCAAGACCGAGATTACCCTGGCCAAC

- Truncated PmCDA1 with point mutation (30-150, W122E, W139Q)

TCACACCGCTGCTACGTGCTGTTTGAGTTGAAGCGAAGGGGCGAAAGAAGGGCTTGCTTTTGGGGCTATGCCGTCAACAAGCCCCAAAGTGGCACCGAGAGAGGAATACACGCTGAGATATTCAGTATCCGAAAGGTGGAAGAGTATCTTCGGGATAATCCTGGGCAGTTTACGATCAACTGGTATTCCAGCTGGAGTCCTTGCGCTGATTGTGCCGAGAAAATTCTGGAATGGTATAATCAGGAACTTCGGGGAAACGGGCACACATTGAAAATCGAAGCCTGCAAGCTGTACTACGAGAAGAATGCCCGGAACCAGATAGGACTCCAGAATCTGAGGGACAATGGTGTAGGCCTGAACGTG

- GS Linker

GGTGGAGGTGGCAGTGATGTCGGCGGAGGCTCC

- nSpCas9 (D10A, 1055-1368) plus linker

GGCGAGATCCGGAAGCGGCCTCTGATCGAGACAAACGGCGAAACCGGGGAGATCGTGTGGGATAAGGGCCGGGATTTTGCCACCGTGCGGAAAGTGCTGAGCATGCCCCAAGTGAATATCGTGAAAAAGACCGAGGTGCAGACAGGCGGCTTCAGCAAAGAGTCTATCCTGCCCAAGAGGAACAGCGATAAGCTGATCGCCAGAAAGAAGGACTGGGACCCTAAGAAGTACGGCGGCTTCGACAGCCCCACCGTGGCCTATTCTGTGCTGGTGGTGGCCAAAGTGGAAAAGGGCAAGTCCAAGAAACTGAAGAGTGTGAAAGAGCTGCTGGGGATCACCATCATGGAAAGAAGCAGCTTCGAGAAGAATCCCATCGACTTTCTGGAAGCCAAGGGCTACAAAGAAGTGAAAAAGGACCTGATCATCAAGCTGCCTAAGTACTCCCTGTTCGAGCTGGAAAACGGCCGGAAGAGAATGCTGGCCTCTGCCGGCGAACTGCAGAAGGGAAACGAACTGGCCCTGCCCTCCAAATATGTGAACTTCCTGTACCTGGCCAGCCACTATGAGAAGCTGAAGGGCTCCCCCGAGGATAATGAGCAGAAACAGCTGTTTGTGGAACAGCACAAGCACTACCTGGACGAGATCATCGAGCAGATCAGCGAGTTCTCCAAGAGAGTGATCCTGGCCGACGCTAATCTGGACAAAGTGCTGTCCGCCTACAACAAGCACCGGGATAAGCCCATCAGAGAGCAGGCCGAGAATATCATCCACCTGTTTACCCTGACCAATCTGGGAGCCCCTGCCGCCTTCAAGTACTTTGACACCACCATCGACCGGAAGAGGTACACCAGCACCAAAGAGGTGCTGGACGCCACCCTGATCCACCAGAGCATCACCGGCCTGTACGAGACACGGATCGACCTGTCTCAGCTGGGAGGTGACAGCGGCGGGAGCGGCGGGAGCGGGGGGAGC

- 2xUGI plus SV40 NLS

ACTAATCTGAGCGACATCATTGAGAAGGAGACTGGGAAACAGCTGGTCATTCAGGAGTCCATCCTGATGCTGCCTGAGGAGGTGGAGGAAGTGATCGGCAACAAGCCAGAGTCTGACATCCTGGTGCACACCGCCTACGACGAGTCCACAGATGAGAATGTGATGCTGCTGACCTCTGACGCCCCCGAGTATAAGCCTTGGGCCCTGGTCATCCAGGATTCTAACGGCGAGAATAAGATCAAGATGCTGAGCGGAGGATCCGGAGGATCTGGAGGCAGCACCAACCTGTCTGACATCATCGAGAAGGAGACAGGCAAGCAGCTGGTCATCCAGGAGAGCATCCTGATGCTGCCCGAAGAAGTCGAAGAAGTGATCGGAAACAAGCCTGAGAGCGATATCCTGGTCCATACCGCCTACGACGAGAGTACCGACGAAAATGTGATGCTGCTGACATCCGACGCCCCAGAGTATAAGCCCTGGGCTCTGGTCATCCAGGATTCCAACGGAGAGAACAAAATCAAAATGCTGTCTGGCGGCTCAAAAAGAACCGCCGACGGCAGCGAATTCGAGCCCAAGAAGAAGAGGAAAGTC

**Supplementary Sequence. S3_ Nucleotide sequences SaCas9 related variants for mammalian expression**

**SaAID**

- CMV promotor

GACATTGATTATTGACTAGTTATTAATAGTAATCAATTACGGGGTCATTAGTTCATAGCCCATATATGGAGTTCCGCGTTACATAACTTACGGTAAATGGCCCGCCTGGCTGACCGCCCAACGACCCCCGCCCATTGACGTCAATAATGACGTATGTTCCCATAGTAACGCCAATAGGGACTTTCCATTGACGTCAATGGGTGGAGTATTTACGGTAAACTGCCCACTTGGCAGTACATCAAGTGTATCATATGCCAAGTACGCCCCCTATTGACGTCAATGACGGTAAATGGCCCGCCTGGCATTATGCCCAGTACATGACCTTATGGGACTTTCCTACTTGGCAGTACATCTACGTATTAGTCATCGCTATTACCATGGTGATGCGGTTTTGGCAGTACATCAATGGGCGTGGATAGCGGTTTGACTCACGGGGATTTCCAAGTCTCCACCCCATTGACGTCAATGGGAGTTTGTTTTGGCACCAAAATCAACGGGACTTTCCAAAATGTCGTAACAACTCCGCCCCATTGACGCAAATGGGCGGTAGGCGTGTACGGTGGGAGGTCTATATAAGCAGAGCT

- NLS unit

ATGGCACCGAAGAAGAAGCGTAAAGTCGGAATCCACGGAGTTCCTGCGGCA

- nSaCas9 (D10A)

AAGCGAAATTACATTCTGGGGCTGGCCATTGGCATTACATCAGTGGGCTATGGCATCATTGACTACGAGACAAGGGACGTGATCGACGCCGGCGTGAGACTGTTCAAGGAGGCCAACGTGGAGAACAATGAGGGCCGGAGATCCAAGAGGGGAGCAAGGCGCCTGAAGCGGAGAAGGCGCCACAGAATCCAGAGAGTGAAGAAGCTGCTGTTCGATTACAACCTGCTGACCGACCACTCCGAGCTGTCTGGCATCAATCCTTATGAGGCCAGAGTGAAGGGCCTGTCCCAGAAGCTGTCTGAGGAGGAGTTTAGCGCCGCCCTGCTGCACCTGGCAAAGAGGAGAGGCGTGCACAACGTGAATGAGGTGGAGGAGGACACCGGCAACGAGCTGTCCACAAAGGAGCAGATCAGCCGCAATTCCAAGGCCCTGGAGGAGAAGTATGTGGCCGAGCTGCAGCTGGAGCGGCTGAAGAAGGATGGCGAGGTGAGGGGCTCCATCAATCGCTTCAAGACCTCTGACTACGTGAAGGAGGCCAAGCAGCTGCTGAAGGTGCAGAAGGCCTACCACCAGCTGGATCAGTCCTTTATCGATACATATATCGACCTGCTGGAGACAAGGCGCACATACTATGAGGGACCAGGAGAGGGCTCTCCCTTCGGCTGGAAGGACATCAAGGAGTGGTACGAGATGCTGATGGGCCACTGCACCTATTTTCCAGAGGAGCTGAGAAGCGTGAAGTACGCCTATAACGCCGATCTGTACAACGCCCTGAATGACCTGAACAACCTGGTCATCACCAGGGATGAGAACGAGAAGCTGGAGTACTATGAGAAGTTCCAGATCATCGAGAACGTGTTCAAGCAGAAGAAGAAGCCTACACTGAAGCAGATCGCCAAGGAGATCCTGGTGAACGAGGAGGACATCAAGGGCTACCGCGTGACCTCCACAGGCAAGCCAGAGTTCACCAATCTGAAGGTGTATCACGATATCAAGGACATCACAGCCCGGAAGGAGATCATCGAGAACGCCGAGCTGCTGGATCAGATCGCCAAGATCCTGACCATCTATCAGAGCTCCGAGGACATCCAGGAGGAGCTGACCAACCTGAATAGCGAGCTGACACAGGAGGAGATCGAGCAGATCAGCAATCTGAAGGGCTACACCGGCACACACAACCTGAGCCTGAAGGCCATCAATCTGATCCTGGATGAGCTGTGGCACACAAACGACAATCAGATCGCCATCTTTAACCGGCTGAAGCTGGTGCCAAAGAAGGTGGACCTGTCCCAGCAGAAGGAGATCCCAACCACACTGGTGGACGATTTCATCCTGTCTCCCGTGGTGAAGCGGAGCTTCATCCAGAGCATCAAAGTGATCAACGCCATCATCAAGAAGTACGGCCTGCCCAATGATATCATCATCGAGCTGGCCAGGGAGAAGAACTCCAAGGACGCCCAGAAGATGATCAATGAGATGCAGAAGAGGAACCGCCAGACCAATGAGCGGATCGAGGAGATCATCAGAACCACAGGCAAGGAGAACGCCAAGTACCTGATCGAGAAGATCAAGCTGCACGATATGCAGGAGGGCAAGTGTCTGTATTCTCTGGAGGCCATCCCTCTGGAGGACCTGCTGAACAATCCATTCAACTACGAGGTGGATCACATCATCCCCCGGAGCGTGAGCTTCGACAATTCTTTTAACAATAAGGTGCTGGTGAAGCAGGAGGAGAACAGCAAGAAGGGCAATAGGACCCCTTTCCAGTACCTGTCTAGCTCCGATTCTAAGATCAGCTACGAGACATTCAAGAAGCACATCCTGAATCTGGCCAAGGGCAAGGGCCGCATCAGCAAGACCAAGAAGGAGTACCTGCTGGAGGAGCGGGACATCAACAGATTCTCCGTGCAGAAGGACTTCATCAACCGGAATCTGGTGGACACCAGATACGCCACACGCGGCCTGATGAATCTGCTGCGGTCTTATTTCAGAGTGAACAATCTGGATGTGAAGGTGAAGAGCATCAACGGCGGCTTCACCTCCTTTCTGCGGAGAAAGTGGAAGTTTAAGAAGGAGCGCAACAAGGGCTATAAGCACCACGCCGAGGATGCCCTGATCATCGCCAATGCCGACTTCATCTTTAAGGAGTGGAAGAAGCTGGACAAGGCCAAGAAAGTGATGGAGAACCAGATGTTCGAGGAGAAGCAGGCCGAGAGCATGCCCGAGATCGAGACAGAGCAGGAGTACAAGGAGATTTTCATCACACCTCACCAGATCAAGCACATCAAGGACTTCAAGGACTACAAGTATTCTCACAGGGTGGATAAGAAGCCCAACCGCGAGCTGATCAATGACACCCTGTATAGCACACGGAAGGACGATAAGGGCAATACCCTGATCGTGAACAATCTGAACGGCCTGTACGACAAGGATAATGACAAGCTGAAGAAGCTGATCAACAAGTCTCCCGAGAAGCTGCTGATGTACCACCACGATCCTCAGACATATCAGAAGCTGAAGCTGATCATGGAGCAGTACGGCGACGAGAAGAACCCACTGTATAAGTACTATGAGGAGACAGGCAACTACCTGACAAAGTATAGCAAGAAGGATAATGGCCCCGTGATCAAGAAGATCAAGTACTATGGCAACAAGCTGAATGCCCACCTGGACATCACCGACGATTACCCTAACTCTCGCAATAAGGTGGTGAAGCTGAGCCTGAAGCCATACCGGTTCGACGTGTACCTGGACAACGGCGTGTATAAGTTTGTGACAGTGAAGAATCTGGATGTGATCAAGAAGGAGAACTACTATGAGGTGAACAGCAAGTGCTACGAGGAGGCCAAGAAGCTGAAGAAGATCAGCAACCAGGCCGAGTTCATCGCCTCTTTTTACAACAATGACCTGATCAAGATCAATGGCGAGCTGTATAGAGTGATCGGCGTGAACAATGATCTGCTGAACAGAATCGAAGTGAATATGATCGACATCACCTACAGGGAGTATCTGGAGAACATGAATGATAAGAGGCCCCCTCGCATCATCAAGACCATCGCCTCTAAGACACAGAGCATCAAGAAGTACAGCACAGACATCCTGGGGAACCTGTATGAAGTCAAGAGCAAGAAACATCCTCAGATTATCAAGAAAGGC

- SV40 NLS plus GS linker

CCCAAGAAGAAGAGGAAGGTGGGTGGAGGAGGTACCGGCGGTGGAGGCTCA

- Dead SH3 domain

GCAGAATACGTACGAGCTCTGTTTGACTTCAATGGGAATGACGAGGAGGATCTCCCCTTTAAGAAGGGCGATATTCTCCGCATCAGAGATAAGCCCGAAGAACAATGGTGGAATGCCGAGGATAGCGAAGGGAAAAGGGGCATGATTCTGGTGCCATATGTGGAGAAATATTCCGGT

- 3xFlag domain

GACTACAAAGACCATGATGGGGATTACAAAGACCACGACATCGACTACAAAGACGACGACGATAAATCAGGG

- PmCDA1 plus SV40 NLS

ATGACAGACGCCGAGTACGTGCGCATTCATGAGAAACTGGATATTTACACCTTCAAGAAGCAGTTCTTCAACAACAAGAAATCTGTGTCACACCGCTGCTACGTGCTGTTTGAGTTGAAGCGAAGGGGCGAAAGAAGGGCTTGCTTTTGGGGCTATGCCGTCAACAAGCCCCAAAGTGGCACCGAGAGAGGAATACACGCTGAGATATTCAGTATCCGAAAGGTGGAAGAGTATCTTCGGGATAATCCTGGGCAGTTTACGATCAACTGGTATTCCAGCTGGAGTCCTTGCGCTGATTGTGCCGAGAAAATTCTGGAATGGTATAATCAGGAACTTCGGGGAAACGGGCACACATTGAAAATCTGGGCCTGCAAGCTGTACTACGAGAAGAATGCCCGGAACCAGATAGGACTCTGGAATCTGAGGGACAATGGTGTAGGCCTGAACGTGATGGTTTCCGAGCACTATCAGTGTTGTCGGAAGATTTTCATCCAAAGCTCTCATAACCAGCTCAATGAAAACCGCTGGTTGGAGAAAACACTGAAACGTGCGGAGAAGCGGAGATCCGAGCTGAGCATCATGATCCAGGTCAAGATTCTGCATACCACTAAGTCTCCAGCCGTTGGTCCCAAGAAGAAAAGAAAAGTCGGTACC

- UGI

ATGACCAACCTTTCCGACATCATAGAGAAGGAAACAGGCAAACAGTTGGTCATCCAAGAGTCGATACTCATGCTTCCTGAAGAAGTTGAGGAGGTCATTGGGAATAAGCCGGAAAGTGACATTCTCGTACACACTGCGTATGATGAGAGCACCGATGAGAACGTGATGCTGCTCACGTCAGATGCCCCAGAGTACAAACCCTGGGCTCTGGTGATTCAGGACTCTAATGGAGAGAACAAGATCAAGATGCTA

- SV40 poly(A) signal

AACTTGTTTATTGCAGCTTATAATGGTTACAAATAAAGCAATAGCATCACAAATTTCACAAATAAAGCATTTTTTTCACTGCATTCTAGTTGTGGTTTGTCCAAACTCATCAATGTATCTTA

- H1 promotor

AATTCGAACGCTGACGTCATCAACCCGCTCCAAGGAATCGCgggccCAGTGTCACTAGGCGGGAACACCCAGCGCGCGTGCGCCCTGGCAGGAAGATGGCTGTGAGGGACAGGGGAGTGGCGCCCTGCAATATTTGCATGTCGCTATGTGTTCTGGGAAATCACCATAAACGTGAAATGTCTTTGGATTTGGGAATCTTATAAGTTCTGTATGAGGACCACAGATCCCC

- SaCas9 gRNA scaffold

GTTTTAGTACTCTGGAAACAGAATCTACTAAAACAAGGCAAAATGCCGTGTTTATCTCGTCAACTTGTTGGCGAGA

- iRFP670

ATGGCGCGTAAGGTCGATCTCACCTCCTGCGATCGCGAGCCGATCCACATCCCCGGCAGCATTCAGCCGTGCGGCTGCCTGCTAGCCTGCGACGCGCAGGCGGTGCGGATCACGCGCATTACGGAAAATGCCGGCGCGTTCTTTGGACGCGAAACTCCGCGGGTCGGTGAGCTACTCGCCGATTACTTCGGCGAGACCGAAGCCCATGCGCTGCGCAACGCACTGGCGCAGTCCTCCGATCCAAAGCGACCGGCGCTGATCTTCGGTTGGCGCGACGGCCTGACCGGCCGCACCTTCGACATCTCACTGCATCGCCATGACGGTACATCGATCATCGAGTTCGAGCCTGCGGCGGCCGAACAGGCCGACAATCCGCTGCGGCTGACGCGGCAGATCATCGCGCGCACCAAAGAACTGAAGTCGCTCGAAGAGATGGCCGCACGGGTGCCGCGCTATCTGCAGGCGATGCTCGGCTATCACCGCGTGATGTTGTACCGCTTCGCGGACGACGGCTCCGGGATGGTGATCGGCGAGGCGAAGCGCAGCGACCTCGAGAGCTTTCTCGGTCAGCACTTTCCGGCGTCGCTGGTCCCGCAGCAGGCGCGGCTACTGTACTTGAAGAACGCGATCCGCGTGGTCTCGGATTCGCGCGGCATCAGCAGCCGGATCGTGCCCGAGCACGACGCCTCCGGCGCCGCGCTCGATCTGTCGTTCGCGCACCTGCGCAGCATCTCGCCCTGCCATCTCGAATTTCTGCGGAACATGGGCGTCAGCGCCTCGATGTCGCTGTCGATCATCATTGACGGCACGCTATGGGGATTGATCATCTGTCATCATTACGAGCCGCGTGCCGTGCCGATGGCGCAGCGCGTCGCGGCCGAAATGTTCGCCGACTTCTTATCGCTGCACTTCACCGCCGCCCACCACCAACGCTAA

**SaAID-3S**

- ScpI promotor

GTACTTATATAAGGGGGTGGGGGCGCGTTCGTCCTCAGTCGCGATCGAACACTCGAGCCGAGCAGACGTGCCTACGGACCG

- NLS unit

ATGGCACCGAAGAAGAAGCGTAAAGTCGGAATCCACGGAGTTCCTGCGGCA

- nSaCas9 (D10A, 1-615)

AAGCGAAATTACATTCTGGGGCTGGCCATTGGCATTACATCAGTGGGCTATGGCATCATTGACTACGAGACAAGGGACGTGATCGACGCCGGCGTGAGACTGTTCAAGGAGGCCAACGTGGAGAACAATGAGGGCCGGAGATCCAAGAGGGGAGCAAGGCGCCTGAAGCGGAGAAGGCGCCACAGAATCCAGAGAGTGAAGAAGCTGCTGTTCGATTACAACCTGCTGACCGACCACTCCGAGCTGTCTGGCATCAATCCTTATGAGGCCAGAGTGAAGGGCCTGTCCCAGAAGCTGTCTGAGGAGGAGTTTAGCGCCGCCCTGCTGCACCTGGCAAAGAGGAGAGGCGTGCACAACGTGAATGAGGTGGAGGAGGACACCGGCAACGAGCTGTCCACAAAGGAGCAGATCAGCCGCAATTCCAAGGCCCTGGAGGAGAAGTATGTGGCCGAGCTGCAGCTGGAGCGGCTGAAGAAGGATGGCGAGGTGAGGGGCTCCATCAATCGCTTCAAGACCTCTGACTACGTGAAGGAGGCCAAGCAGCTGCTGAAGGTGCAGAAGGCCTACCACCAGCTGGATCAGTCCTTTATCGATACATATATCGACCTGCTGGAGACAAGGCGCACATACTATGAGGGACCAGGAGAGGGCTCTCCCTTCGGCTGGAAGGACATCAAGGAGTGGTACGAGATGCTGATGGGCCACTGCACCTATTTTCCAGAGGAGCTGAGAAGCGTGAAGTACGCCTATAACGCCGATCTGTACAACGCCCTGAATGACCTGAACAACCTGGTCATCACCAGGGATGAGAACGAGAAGCTGGAGTACTATGAGAAGTTCCAGATCATCGAGAACGTGTTCAAGCAGAAGAAGAAGCCTACACTGAAGCAGATCGCCAAGGAGATCCTGGTGAACGAGGAGGACATCAAGGGCTACCGCGTGACCTCCACAGGCAAGCCAGAGTTCACCAATCTGAAGGTGTATCACGATATCAAGGACATCACAGCCCGGAAGGAGATCATCGAGAACGCCGAGCTGCTGGATCAGATCGCCAAGATCCTGACCATCTATCAGAGCTCCGAGGACATCCAGGAGGAGCTGACCAACCTGAATAGCGAGCTGACACAGGAGGAGATCGAGCAGATCAGCAATCTGAAGGGCTACACCGGCACACACAACCTGAGCCTGAAGGCCATCAATCTGATCCTGGATGAGCTGTGGCACACAAACGACAATCAGATCGCCATCTTTAACCGGCTGAAGCTGGTGCCAAAGAAGGTGGACCTGTCCCAGCAGAAGGAGATCCCAACCACACTGGTGGACGATTTCATCCTGTCTCCCGTGGTGAAGCGGAGCTTCATCCAGAGCATCAAAGTGATCAACGCCATCATCAAGAAGTACGGCCTGCCCAATGATATCATCATCGAGCTGGCCAGGGAGAAGAACTCCAAGGACGCCCAGAAGATGATCAATGAGATGCAGAAGAGGAACCGCCAGACCAATGAGCGGATCGAGGAGATCATCAGAACCACAGGCAAGGAGAACGCCAAGTACCTGATCGAGAAGATCAAGCTGCACGATATGCAGGAGGGCAAGTGTCTGTATTCTCTGGAGGCCATCCCTCTGGAGGACCTGCTGAACAATCCATTCAACTACGAGGTGGATCACATCATCCCCCGGAGCGTGAGCTTCGACAATTCTTTTAACAATAAGGTGCTGGTGAAGCAGGAGGAGAACAGCAAGAAGGGCAATAGGACCCCTTTCCAGTACCTGTCTAGCTCCGATTCTAAGATCAGCTACGAGACATTCAAGAAGCACATCCTGAATCTGGCCAAGGGCAAG

- Truncated PmCDA1 with point mutation (30-150, W122E, W139Q)

TCACACCGCTGCTACGTGCTGTTTGAGTTGAAGCGAAGGGGCGAAAGAAGGGCTTGCTTTTGGGGCTATGCCGTCAACAAGCCCCAAAGTGGCACCGAGAGAGGAATACACGCTGAGATATTCAGTATCCGAAAGGTGGAAGAGTATCTTCGGGATAATCCTGGGCAGTTTACGATCAACTGGTATTCCAGCTGGAGTCCTTGCGCTGATTGTGCCGAGAAAATTCTGGAATGGTATAATCAGGAACTTCGGGGAAACGGGCACACATTGAAAATCGAAGCCTGCAAGCTGTACTACGAGAAGAATGCCCGGAACCAGATAGGACTCCAGAATCTGAGGGACAATGGTGTAGGCCTGAACGTG

- GS Linker

GGTGGAGGTGGCAGTGATGTCGGCGGAGGCTCC

- nSaCas9 (D10A, 616-1053) plus SV40 NLS

GGCCGCATCAGCAAGACCAAGAAGGAGTACCTGCTGGAGGAGCGGGACATCAACAGATTCTCCGTGCAGAAGGACTTCATCAACCGGAATCTGGTGGACACCAGATACGCCACACGCGGCCTGATGAATCTGCTGCGGTCTTATTTCAGAGTGAACAATCTGGATGTGAAGGTGAAGAGTATCAACGGCGGCTTCACCTCCTTTCTGCGGAGAAAGTGGAAGTTTAAGAAGGAGCGCAACAAGGGCTATAAGCACCACGCCGAGGATGCCCTGATCATCGCCAATGCCGACTTCATCTTTAAGGAGTGGAAGAAGCTGGACAAGGCCAAGAAAGTGATGGAGAACCAGATGTTCGAGGAGAAGCAGGCCGAGAGCATGCCCGAGATCGAGACAGAGCAGGAGTACAAGGAGATTTTCATCACACCTCACCAGATCAAGCACATCAAGGACTTCAAGGACTACAAGTATTCTCACAGGGTGGATAAGAAGCCCAACCGCGAGCTGATCAATGACACCCTGTATAGCACACGGAAGGACGATAAGGGCAATACCCTGATCGTGAACAATCTGAACGGCCTGTACGACAAGGATAATGACAAGCTGAAGAAGCTGATCAACAAGTCTCCCGAGAAGCTGCTGATGTACCACCACGATCCTCAGACATATCAGAAGCTGAAGCTGATCATGGAGCAGTACGGCGACGAGAAGAACCCACTGTATAAGTACTATGAGGAGACAGGCAACTACCTGACAAAGTATAGCAAGAAGGATAATGGCCCCGTGATCAAGAAGATCAAGTACTATGGCAACAAGCTGAATGCCCACCTGGACATCACCGACGATTACCCTAACTCTCGCAATAAGGTGGTGAAGCTGAGCCTGAAGCCATACCGGTTCGACGTGTACCTGGACAACGGCGTGTATAAGTTTGTGACAGTGAAGAATCTGGATGTGATCAAGAAGGAGAACTACTATGAGGTGAACAGCAAGTGCTACGAGGAGGCCAAGAAGCTGAAGAAGATCAGCAACCAGGCCGAGTTCATCGCCTCTTTTTACAACAATGACCTGATCAAGATCAATGGCGAGCTGTATAGAGTGATCGGCGTGAACAATGATCTGCTGAACAGAATCGAAGTGAATATGATCGACATCACCTACAGGGAGTATCTGGAGAACATGAATGATAAGAGGCCCCCTCGCATCATCAAGACCATCGCCTCTAAGACACAGAGCATCAAGAAGTACAGCACAGACATCCTGGGGAACCTGTATGAAGTCAAGAGCAAGAAACATCCTCAGATTATCAAGAAAGGCGGTGGAGGTCCCAAGAAGAAAAGAAAAGTCGGTACC

- UGI

ATGACCAACCTTTCCGACATCATAGAGAAGGAAACAGGCAAACAGTTGGTCATCCAAGAGTCGATACTCATGCTTCCTGAAGAAGTTGAGGAGGTCATTGGGAATAAGCCGGAAAGTGACATTCTCGTACACACTGCGTATGATGAGAGCACCGATGAGAACGTGATGCTGCTCACGTCAGATGCCCCAGAGTACAAACCCTGGGCTCTGGTGATTCAGGACTCTAATGGAGAGAACAAGATCAAGATGCTA

- Ploy-A tail

AATAAAAGATCTTTATTTTCATTAGATCTGTGTGTTGGTTTTTTGTGTG

- H1 promotor

AATTCGAACGCTGACGTCATCAACCCGCTCCAAGGAATCGCgggccCAGTGTCACTAGGCGGGAACACCCAGCGCGCGTGCGCCCTGGCAGGAAGATGGCTGTGAGGGACAGGGGAGTGGCGCCCTGCAATATTTGCATGTCGCTATGTGTTCTGGGAAATCACCATAAACGTGAAATGTCTTTGGATTTGGGAATCTTATAAGTTCTGTATGAGGACCACAGATCCCC

- SaCas9 gRNA scaffold

GTTTTAGTACTCTGGAAACAGAATCTACTAAAACAAGGCAAAATGCCGTGTTTATCTCGTCAACTTGTTGGCGAGA

- iRFP670

ATGGCGCGTAAGGTCGATCTCACCTCCTGCGATCGCGAGCCGATCCACATCCCCGGCAGCATTCAGCCGTGCGGCTGCCTGCTAGCCTGCGACGCGCAGGCGGTGCGGATCACGCGCATTACGGAAAATGCCGGCGCGTTCTTTGGACGCGAAACTCCGCGGGTCGGTGAGCTACTCGCCGATTACTTCGGCGAGACCGAAGCCCATGCGCTGCGCAACGCACTGGCGCAGTCCTCCGATCCAAAGCGACCGGCGCTGATCTTCGGTTGGCGCGACGGCCTGACCGGCCGCACCTTCGACATCTCACTGCATCGCCATGACGGTACATCGATCATCGAGTTCGAGCCTGCGGCGGCCGAACAGGCCGACAATCCGCTGCGGCTGACGCGGCAGATCATCGCGCGCACCAAAGAACTGAAGTCGCTCGAAGAGATGGCCGCACGGGTGCCGCGCTATCTGCAGGCGATGCTCGGCTATCACCGCGTGATGTTGTACCGCTTCGCGGACGACGGCTCCGGGATGGTGATCGGCGAGGCGAAGCGCAGCGACCTCGAGAGCTTTCTCGGTCAGCACTTTCCGGCGTCGCTGGTCCCGCAGCAGGCGCGGCTACTGTACTTGAAGAACGCGATCCGCGTGGTCTCGGATTCGCGCGGCATCAGCAGCCGGATCGTGCCCGAGCACGACGCCTCCGGCGCCGCGCTCGATCTGTCGTTCGCGCACCTGCGCAGCATCTCGCCCTGCCATCTCGAATTTCTGCGGAACATGGGCGTCAGCGCCTCGATGTCGCTGTCGATCATCATTGACGGCACGCTATGGGGATTGATCATCTGTCATCATTACGAGCCGCGTGCCGTGCCGATGGCGCAGCGCGTCGCGGCCGAAATGTTCGCCGACTTCTTATCGCTGCACTTCACCGCCGCCCACCACCAACGCTAA

**Supplementary Table. S1_ CAN1 target sequence**

| Site name | gRNA | Protospacer (CAN1) | PAM |
| --- | --- | --- | --- |
| CAN1 | Site 1 | GCCCAGTTGGATTCCGTTAT | TGG |
| Site 2 | CTCCAATAACGGAATCCAAC | TGG |
| Site 3 | TTGGCCAAGTCATTCAATTT | TGG |

**Supplementary Table. S2_Target protospacers and amplicons used in this study conducting with mammalian cell expression**

- SpCas9 genomic loci:

| Site name | Protospacer | PAM | Amplicon |
| --- | --- | --- | --- |
| HEK2 | GAACACAAAGCATAGACTGC | GGG | ATGAATGGATTCCTTGGAAACAATGATAACAAGACCTGGCTGAGCTAACTGTGACAGCATGTGGTAATTTTCCAGCCCGCTGGCCCTGTAAAGGAAACTGGAACACAAAGCATAGACTGCGGGGCGGGCCAGCCTGAATAGCTGCAAACAAGTGCAGAATATCTGATGATGTCATACGCACAGTTTGACAGATGGGGCTGGACAATTTTTCCCCCTTTAA |
| HEK3 | GGCCCAGACTGAGCACGTGA | TGG | CGCCCATGCAATTAGTCTATTTCTGCTGCAAGTAAGCATGCATTTGTAGGCTTGATGCTTTTTTTCTGCTTCTCCAGCCCTGGCCTGGGTCAATCCTTGGGGCCCAGACTGAGCACGTGATGGCAGAGGAAAGGAAGCCCTGCTTCCTCCAGAGGGCGTCGCAGGACAGCTTTTCCTAGACAGGGGCTAGTATGTGCAGCTCCTGCACCGGGATACTGGT |
| RNF2 | GTCATCTTAGTCATTACCTG | AGG | ACGTCTCATATGCCCCTTGGCAGTCATCTTAGTCATTACCTGAGGTGTTCGTTGTAACTCATATAAACTGAGTTCCCATGTTTTGCTTAATGGTTGAGTTCCGTTTGTCTGCACAGCCTGAGACATTGCTGGAAATAAAGAAGAGAGAAAAACAATTTTAGTATTTGGAAGGGAAGTGCTATGGTCTGAATGTATGTGTCCCACCAAAATTCCTACGT |
| VEGFA | CCCCCTCCACCCCGCCTC | CGG | CTCCGCTCGGCTCGGCTTCCCCCGCGCGGACCACGGCTCCTCCGAAGCGAGAACAGCCCAGAAGTTGGACGAAAAGTTTCAGTGCGACGCCGCGAGCCCCGACCCCCTCCACCCCGCCTCCGGGCGCGGGCTCCGGCCCCTGCCCGCGGCTCGCCGCCGCGTCCACTGTCCGCCGCCGGCCGGGGAGGAGGTGGTAGCTGGGGCTGGGGGCGGTGTCTGT |

- SaCas9 genomic loci:

| Site name | Protospacer | PAM | Amplicon |
| --- | --- | --- | --- |
| SaCas9 site 1 | GTGGTAGACAGCATGTGTCCTA | AAGGGT | ATGCCCCTTTGCCTCAAGTCTGGTTATTTTAGGGGGATGCTAGGTTGCTTTGGGTCTACCTTACTGAGAAAATGGCCCCAGGTCATTGTCATGTCCAGTTGTGGTAGACAGCATGTGTCCTAAAGGGTATATTCACATGCATGTGCAAAAATACAGGGGTCCTTCTAACCCTATCACAGAGAAGCAGGAGACTGCAGGATGAGTCAAGATGCTAAGTGATGA |
| SaCas9 site 2 | ATTTACAGCCTGGCCTTTGGGG | TCGGGT | CCTCAGACCAGGGTGCGGTGGGAGATCTGGTTTCCGGAAGACGGAATGGGGAGAAGGGCAGGTTCCCCGAGGCGCCCAGACACCCAATCCTCCCGGTGACATTTACAGCCTGGCCTTTGGGGTCGGGTCAACGCTAGGCTGGCAGGGGAAGGGCGGGGCCGTGAGGTGAGCCGGCGCTGCAGGAAGGGGCCACCACCAGAGGGGCCATTTTGCGGTGGAAAT |
| SaCas9 site 3 | GTGTCAGGTAATGTGCTAAACA | GAGAGT | GTGGCATCCAGAGACATGGTTTCTTATCTCCTTAAGTGTTCAGCTGCTTTTCTTTCATTTATTCCACATATAATTACTATAATTGCTAAACATTTATTTAGTGTCAGGTAATGTGCTAAACAGAGAGTTACTGCTCAGACATGTAATAATAATAAATAACACATCAAATAACCATACCATTTTAAGCTGTAGTATTATGAAGGGAAATCTGGAGCAAAGAGA |
| SaCas9 site 4 | GGTGGAGGAGGGTGCATGGGGT | CAGAAT | TTTTGCTTATCCAGAAAAGGGAGTGATTGCTTCCAGGGGCCTCAGGGGAATAAATCATAGAATCCTGGACAAGGTTTGAAGGACAGGTAGGATTTGGGTGGGTGGAGGAGGGTGCATGGGGTCAGAATTGTAACCGAAAACTCATTCCAGGTGGATAGAGAAAATTTCTAGTGTTGTTGTTTTTAAACTATTTGGGGGACTGGCACAGACCCTTTTTGAATA |
| SaCas9 site 5 | TCTGCTTCTCCAGCCCTGGC | CTGGGT | GATGAGAGAAGCCTGGAGACAGGGATCCCAGGGAAACGCCCATGCAATTAGTCTATTTCTGCTGCAAGTAAGCATGCATTTGTAGGCTTGATGCTTTTTTTCTGCTTCTCCAGCCCTGGCCTGGGTCAATCCTTGGGGCCCAGACTGAGCACGTGATGGCAGAGGAAAGGAAGCCCTGCTTCCTCCAGAGGGCGTCGCAGGACAGCTTTTCCTAGACAGG |
| SaCas9 site 6 (FANCF) | GATGTTCCAATCAGTACGCA | GAGAGT | GGCTTTTAAGTTGCCCAGAGTCAAGGAACACGGATAAAGACGCTGGGAGATTGACATGCATTTCGACCAATAGCATTGCAGAGAGGCGTATCATTTCGCGGATGTTCCAATCAGTACGCAGAGAGTCGCCGTCTCCAAGGTGAAAGCGGAAGTAGGGCCTTCGCGCACCTCATGGAATCCCTTCTGCAGCACCTGGATCGCTTTTCCGAGCTTCTGGCGG |
| SaCas9 site 7 (VEGFA) | GCCCGCCCTCCCCCGCCCGG | CCGGGT | TGGGAAAAGTTTTGGGGTGGATTGCTGCGGGGACCCCCCCTCCCTGCTGGGCCACCTGCGCCGCGCCAACCCCGCCCGTCCCCGCTCGCGTCCCGCTCGGTGCCCGCCCTCCCCCGCCCGGCCGGGTGCGCGCGGCGCGGAGCCGATTACATCAGCCCGGGCCTGGCCGGCCGCGTGTTCCCGGAGCCTCGGCTGCCCGAATGGGGAGCCCAGAGTGGCGAG |

- SpCas9 gRNA dependent off-target genomic loci:

| Site name | Protospacer | PAM | Amplicon |
| --- | --- | --- | --- |
| HEK2_site1 | GAACACAATGCATAGATTGC | CGG | TCTGTAACTAGAACAATGGGTTCAAAAACAAACAGAGAAGACAAGTAAATTAATAAGTACTGTAGTCCAGATAATCAGAGTGTGGAGAGTGAGTAAGCCAGAACACAATGCATAGATTGCCGGTAAATAGGTTTAGATTCATCCATTTTTAAAAAATGGTGTGGGAGCATTAAATATGTATATAGTAGATATGGAAAAATGATTCTCATAATAACTGACA |
| HEK2_site2 | AAACATAAAGCATAGACTGC | AAA | TAGCTCAGGGAAGGAGCAGTGAGTTTGGGCACTTGTGACAGAATAGTGGGACTATGCCAGAGATACACAGGAGGAGGTGGTACCTTCTAGCTCCCCCTCAAAACATAAAGCATAGACTGCAAAGTACTCCCAAGCAGGCTGAATAACACTCGAGTACCAAAAAAATACACTCTGAAACAATACCAATAATTTTTTTAAAAATTATATATACCATGATAGT |
| VEGFA_site1 | GACCCCCCCCACCCCGCCCC | CGG | CTTTTTAAGGTTTCCCAATTTCATCTTCAGAACAGTTAGAATCTACTGACTAATTCTGAGCAGAGGAATATGTGACATGAGGAGATTTGCATTTCCAAAAGACCCCCCCCACCCCGCCCCCGGCTGCTGTTGCAGAGGACAAGTTGAGGAGGGCAGAGAGGATGTGGAGAGGACAGCAGGGAGTACTGCAGCTGTCCAAGTCAGAGATTGTAGTGGCTCT |
| VEGFA_site2 | GCCCCCACCCACCCCGCCTC | TGG | GAGCCCTCCTCTCTTGCTTCTTGCTCTGACCTTGTTTGTTATTCCACAGAGAAAACTTTCAAAAACAGCCAGAAGAGAACATCCACGAGCTCCCACCACTGCCCCCACCCACCCCGCCTCTGGCCCATGTATTCTGCTTTCTCTTGTTTTAATCTTTCCCTCTCAACAAAGAGCAACTTCTTCCTTCTAACTGCTCAGCCGAAAAGCCTTGGAGTCACCC |
| VEGFA_site3 | CGCCCTCCCCACCCCGCCTC | CGG | TCTTGCCTGTCACGCAGACGCCCCCATCAAGCCCACCGCCCACCCCCAACCCCCGTGCGGGCAGCGGCTCCTCGGTGCTCTGGTCCGACGCCCCTTCTGTCGCCCTCCCCACCCCGCCTCCGGCGGACAGAGCTGGGCGGGAGCTGGGACTGGTACCCCCTCCCCACCTCGGAGACACCCTTAACTCCAGGCTGCGATCCTCGTGCCGGGGCCCCGCCGT |
| VEGFA_site4 | CTCCCCACCCACCCCGCCTC | AGG | CTCTGCTTCATGTTGTTGGCAGGAGGCCCCTCCTTCTCATCCTTGTATCAGCTGCCTTCTCATCACAAGATGACTATGTCCCTCTGGGCCCCATCCTCCCCTCCCCACCCACCCCGCCTCAGGCTTGAAGAGGAAAGAAGAGCGCAGGGCCAAAAAAACTTTGTCCTTTAGAAAGGATCTACCTTTTAGGCTGAGAATGGCACTCTCCCCAGAAACATCC |

**Supplementary Table. S3_ Primer list used in this study**

| Name | Sequence (5'-3') | Target | Experiment |
| --- | --- | --- | --- |
| HEK2 1st-1 | TCCCACGTATTGCACTGCCATT | HEK2 gene | 1st round PCR for deep-sequence |
| HEK2 1st-2 | CCCCTCAGCATTCAGCCACTAATA | HEK2 gene | 1st round PCR for deep-sequence |
| HEK2 2nd-1 | TCTTTCCCTACACGACGCTCTTCCGATCTCGGAATGAATGGATTCCTTG | HEK2 gene | 2nd round PCR for deep-sequence |
| HEK2 2nd-2 | GTGACTGGAGTTCAGACGTGTGCTCTTCCGATCTAGCCCCATCTGTCAAACT | HEK2 gene | 2nd round PCR for deep-sequence |
| HEK3 1st-1 | AGCTTGGCATGAGAAACCTTGGAG | HEK3 gene | 1st round PCR for deep-sequence |
| HEK3 1st-2 | TCTGGGTGCCCTGAGATCTTTT | HEK3 gene | 1st round PCR for deep-sequence |
| HEK3 2nd-1 | TCTTTCCCTACACGACGCTCTTCCGATCTGGGAAACGCCCATGCAATTAGTCT | HEK3 gene | 2nd round PCR for deep-sequence |
| HEK3 2nd-2 | GTGACTGGAGTTCAGACGTGTGCTCTTCCGATCTGCTGCACATACTAGCCCCTGTCT | HEK3 gene | 2nd round PCR for deep-sequence |
| RNF2 1st-1 | GTCTGTAAAGTCCATGGTTGGTGC | RNF2 gene | 1st round PCR for deep-sequence |
| RNF2 1st-2 | CTCCCAAAGTCCCCACCTCTTAAT | RNF2 gene | 1st round PCR for deep-sequence |
| RNF2 2nd-1 | TCTTTCCCTACACGACGCTCTTCCGATCTCCAACATACAGAAGTCAGGAATGC | RNF2 gene | 2nd round PCR for deep-sequence |
| RNF2 2nd-2 | GTGACTGGAGTTCAGACGTGTGCTCTTCCGATCTTGTCTCAGGCTGTGCAGACAA | RNF2 gene | 2nd round PCR for deep-sequence |
| VEGFA 1st-1 | AAGGCTCCAATGCACCCAAGA | VEGFA gene | 1st round PCR for deep-sequence |
| VEGFA 1st-2 | CGCTCGGTGCTGGAATTTGATA | VEGFA gene | 1st round PCR for deep-sequence |
| VEGFA 2nd-1 | GTGACTGGAGTTCAGACGTGTGCTCTTCCGATCTCTCCTCCGAAGCGAGAACA | VEGFA gene | 2nd round PCR for deep-sequence |
| VEGFA 2nd-2 | TCTTTCCCTACACGACGCTCTTCCGATCTACGGACAGACAGACAGACAC | VEGFA gene | 2nd round PCR for deep-sequence |
| SaCas9 site_1 1st-1 | GTGGAGTGCTCTGTGTTTGTCT | SaCas9 site_1 R-loop off-target | 1st round PCR for deep-sequence |
| SaCas9 site_1 1st-2 | TACCTGTGCACCTAAGGCATCA | SaCas9 site_1 R-loop off-target | 1st round PCR for deep-sequence |
| SaCas9 site_1 2nd-1 | TCTTTCCCTACACGACGCTCTTCCGATCTTACCAACATACATGCCCCTTTGCC | SaCas9 site_1 R-loop off-target | 2nd round PCR for deep-sequence |
| SaCas9 site_1 2nd-2 | GTGACTGGAGTTCAGACGTGTGCTCTTCCGATCTTCTTGACTCATCCTGCAGTCTCCT | SaCas9 site_1 R-loop off-target | 2nd round PCR for deep-sequence |
| SaCas9 site_2 1st-1 | GATTTGCCAAGTTGCCTGTCCTTC | SaCas9 site_2 R-loop off-target | 1st round PCR for deep-sequence |
| SaCas9 site_2 1st-2 | TGGGTTTATGGAGGTCCTCTTGTG | SaCas9 site_2 R-loop off-target | 1st round PCR for deep-sequence |
| SaCas9 site_2 2nd-1 | TCTTTCCCTACACGACGCTCTTCCGATCTTGCGGTGGGAGATCTGGTTTC | SaCas9 site_2 R-loop off-target | 2nd round PCR for deep-sequence |
| SaCas9 site_2 2nd-2 | GTGACTGGAGTTCAGACGTGTGCTCTTCCGATCTAGGACATTTCCACCGCAAAATGGC | SaCas9 site_2 R-loop off-target | 2nd round PCR for deep-sequence |
| SaCas9 site_3 1st-1 | AGCTGTCCAGAGGTGTTAAGTGCC | SaCas9 site_3 R-loop off-target | 1st round PCR for deep-sequence |
| SaCas9 site_3 1st-2 | TTCACTGTGTTAGCCAGGATGGTC | SaCas9 site_3 R-loop off-target | 1st round PCR for deep-sequence |
| SaCas9 site_3 2nd-1 | TCTTTCCCTACACGACGCTCTTCCGATCTTGGCATCCAGAGACATGGTTTC | SaCas9 site_3 R-loop off-target | 2nd round PCR for deep-sequence |
| SaCas9 site_3 2nd-2 | GTGACTGGAGTTCAGACGTGTGCTCTTCCGATCTCTCTTTGCTCCAGATTTCCCTTCA | SaCas9 site_3 R-loop off-target | 2nd round PCR for deep-sequence |
| SaCas9 site_4 1st-1 | ACAACCTGTCCGCAAGGGAAAA | SaCas9 site_4 R-loop off-target | 1st round PCR for deep-sequence |
| SaCas9 site_4 1st-2 | AGTAGGGGTGAGGGAACAAACCA | SaCas9 site_4 R-loop off-target | 1st round PCR for deep-sequence |
| SaCas9 site_4 2nd-1 | TCTTTCCCTACACGACGCTCTTCCGATCTAGGGGCCTCAGGGGAATAAATCAT | SaCas9 site_4 R-loop off-target | 2nd round PCR for deep-sequence |
| SaCas9 site_4 2nd-2 | GTGACTGGAGTTCAGACGTGTGCTCTTCCGATCTTGGGATTCGACAGAAATGTGAGCC | SaCas9 site_4 R-loop off-target | 2nd round PCR for deep-sequence |
| SaCas9 site_5 1st-1 | AGCTTGGCATGAGAAACCTTGGAG | SaCas9 site_5 R-loop off-target | 1st round PCR for deep-sequence |
| SaCas9 site_5 1st-2 | TCTGGGTGCCCTGAGATCTTTT | SaCas9 site_5 R-loop off-target | 1st round PCR for deep-sequence |
| SaCas9 site_5 2nd-1 | TCTTTCCCTACACGACGCTCTTCCGATCTGGGAAACGCCCATGCAATTAGTCT | SaCas9 site_5 R-loop off-target | 2nd round PCR for deep-sequence |
| SaCas9 site_5 2nd-2 | GTGACTGGAGTTCAGACGTGTGCTCTTCCGATCTGCTGCACATACTAGCCCCTGTCT | SaCas9 site_5 R-loop off-target | 2nd round PCR for deep-sequence |
| SaCas9 site_6 1st-1 | CATCTCGCACGTGGTTCCGGAA | SaCas9 site_6 R-loop off-target | 1st round PCR for deep-sequence |
| SaCas9 site_6 1st-2 | CGACCAAAGCGCCGATGGATGTG | SaCas9 site_6 R-loop off-target | 1st round PCR for deep-sequence |
| SaCas9 site_6 2nd-1 | TCTTTCCCTACACGACGCTCTTCCGATCTGGCTTTTAAGTTGCCCAGAG | SaCas9 site_6 R-loop off-target | 2nd round PCR for deep-sequence |
| SaCas9 site_6 2nd-2 | GTGACTGGAGTTCAGACGTGTGCTCTTCCGATCTCCGCCAGAAGCTCGGAAAA | SaCas9 site_6 R-loop off-target | 2nd round PCR for deep-sequence |
| SaCas9 site_7 1st-1 | ACTGCCACTCGGTCTCTTCA | SaCas9 site_7 R-loop off-target | 1st round PCR for deep-sequence |
| SaCas9 site_7 1st-2 | AGGGGTAGGGATGGTTCTCT | SaCas9 site_7 R-loop off-target | 1st round PCR for deep-sequence |
| SaCas9 site_7 2nd-1 | TCTTTCCCTACACGACGCTCTTCCGATCTGGGAAAAGTTTTGGGGTGGA | SaCas9 site_7 R-loop off-target | 2nd round PCR for deep-sequence |
| SaCas9 site_7 2nd-2 | GTGACTGGAGTTCAGACGTGTGCTCTTCCGATCTCTCGCCACTCTGGGCTCCCCATT | SaCas9 site_7 R-loop off-target | 2nd round PCR for deep-sequence |
| HEK2_off_site-1 1st-1 | GCAGAAGTCGTACTATGCAAGC | HEK2 gene off-target 1 | 1st round PCR for deep-sequence |
| HEK2_off_site-1 1st-2 | TGCATGGGCACATGTGTTTG | HEK2 gene off-target 1 | 1st round PCR for deep-sequence |
| HEK2_off_site-1 2nd-1 | TCTTTCCCTACACGACGCTCTTCCGATCTGACAGATCTGTAACTAGAACAATGGG | HEK2 gene off-target 1 | 2nd round PCR for deep-sequence |
| HEK2_off_site-1 2nd-2 | GTGACTGGAGTTCAGACGTGTGCTCTTCCGATCTCCATATCTACTATATACATATTTAATGCTCCC | HEK2 gene off-target 1 | 2nd round PCR for deep-sequence |
| HEK2_off_site-2 1st-1 | AGAGGCCTTCCAAGCCTGAAAATG | HEK2 gene off-target 2 | 1st round PCR for deep-sequence |
| HEK2_off_site-2 1st-2 | GCATTAATCCATATTTGTATCACCCTCC | HEK2 gene off-target 2 | 1st round PCR for deep-sequence |
| HEK2_off_site-2 2nd-1 | TCTTTCCCTACACGACGCTCTTCCGATCTAGCAGTGAGTTTGGGCACTTGT | HEK2 gene off-target 2 | 2nd round PCR for deep-sequence |
| HEK2_off_site-2 2nd-2 | GTGACTGGAGTTCAGACGTGTGCTCTTCCGATCTTATGATTTCTAACTATCATGG | HEK2 gene off-target 2 | 2nd round PCR for deep-sequence |
| VEGFA_off_site-1 1st-1 | AAAACAGTGCGGTGGAGAAAGG | VEGFA gene off-target 1 | 1st round PCR for deep-sequence |
| VEGFA_off_site-1 1st-2 | CAGAGGGAGAATCAAGCTGTACAC | VEGFA gene off-target 1 | 1st round PCR for deep-sequence |
| VEGFA_off_site-1 2nd-1 | TCTTTCCCTACACGACGCTCTTCCGATCTAAGGTTTCCCAATTTCATCTTCAGAACAG | VEGFA gene off-target 1 | 2nd round PCR for deep-sequence |
| VEGFA_off_site-1 2nd-2 | GTGACTGGAGTTCAGACGTGTGCTCTTCCGATCTTCTCTGACTTGGACAGCTGCAGTA | VEGFA gene off-target 1 | 2nd round PCR for deep-sequence |
| VEGFA_off_site-2 1st-1 | ACAGCACCATGGTTAGACTGAGGA | VEGFA gene off-target 2 | 1st round PCR for deep-sequence |
| VEGFA_off_site-2 1st-2 | CAACAGGATTTGCTGAGGGATTGC | VEGFA gene off-target 2 | 1st round PCR for deep-sequence |
| VEGFA_off_site-2 2nd-1 | TCTTTCCCTACACGACGCTCTTCCGATCTTTCTCCCTACTCAACCCCGAGC | VEGFA gene off-target 2 | 2nd round PCR for deep-sequence |
| VEGFA_off_site-2 2nd-2 | GTGACTGGAGTTCAGACGTGTGCTCTTCCGATCTTTCGGCTGAGCAGTTAGAAGGAAG | VEGFA gene off-target 2 | 2nd round PCR for deep-sequence |
| VEGFA_off_site-3 1st-1 | TGTGGCTGCCCCGCTTATTAAA | VEGFA gene off-target 3 | 1st round PCR for deep-sequence |
| VEGFA_off_site-3 1st-2 | CCGCCTGTGAGCTATTTCCACATT | VEGFA gene off-target 3 | 1st round PCR for deep-sequence |
| VEGFA_off_site-3 2nd-1 | TCTTTCCCTACACGACGCTCTTCCGATCTTCCTGGCCACCTCTTGCCTGTCA | VEGFA gene off-target 3 | 2nd round PCR for deep-sequence |
| VEGFA_off_site-3 2nd-2 | GTGACTGGAGTTCAGACGTGTGCTCTTCCGATCTGAGGATCGCAGCCTGGAGTTAAG | VEGFA gene off-target 3 | 2nd round PCR for deep-sequence |
| VEGFA_off_site-4 1st-1 | ATCACACCCTTTGGGGATCTTTGG | VEGFA gene off-target 4 | 1st round PCR for deep-sequence |
| VEGFA_off_site-4 1st-2 | AAAGGCTTCCTTGAGGCTGAAGTC | VEGFA gene off-target 4 | 1st round PCR for deep-sequence |
| VEGFA_off_site-4 2nd-1 | TCTTTCCCTACACGACGCTCTTCCGATCTTGCTTTCCAGCTCTGCTTCATGT | VEGFA gene off-target 4 | 2nd round PCR for deep-sequence |
| VEGFA_off_site-4 2nd-2 | GTGACTGGAGTTCAGACGTGTGCTCTTCCGATCTGGAGAGTGCCATTCTCAGCCTAAA | VEGFA gene off-target 4 | 2nd round PCR for deep-sequence |
